# Supplementary material for: Exploring the information transmission properties of noise-induced dynamics: application to glioma differentiation
Source: PubMed Central journal article supplement (PMC6610902; doi:10.1186/s12859-019-2970-7), 2019-07-04
Supplement: 12859_2019_2970_MOESM1_ESM.pdf [file 12859_2019_2970_MOESM1_ESM.pdf]

Supplementary Material for *Exploring the Information  
Transmission Properties of Noise-induced Dynamics:  
Application to Glioma Differentiation*

Aditya Sai, Nan Kong

## S1 AN Model Description

$$d[PKA] = a_1 dt + \frac{V_1 \cdot CT^{n_1}}{K_1 + CT^{n_1}} dt - d_1[PKA]dt + \sigma_1 dB_1 \quad (1)$$

$$d[CREB] = \frac{V_2 \cdot [PKA]}{K_2 + [PKA]} dt - d_2[CREB]dt + \sigma_2 dB_2 \quad (2)$$

$$d[P13K] = \frac{1}{1 + \frac{[PKA]}{K_3}} dt - d_3[P13K]dt + \sigma_3 dB_3 \quad (3)$$

$$d[AKT] = \frac{V_4 \cdot [P13K]}{K_4 + [P13K]} dt - d_4[AKT]dt + \sigma_4 dB_4 \quad (4)$$

$$d[pGSK3\beta] = \frac{V_5 \cdot ([GSK3\beta_T] - [pGSK3\beta]) \cdot [AKT]}{K_5 + [GSK3\beta_T] - [pGSK3\beta]} dt - d_5[pGSK3\beta]dt + \sigma_5 dB_5 \quad (5)$$

$$d[CyclinD1] = \frac{V_6 \cdot [CyclinD1]^{n_2}}{K_{6a}^{n_2} + [CyclinD1]^{n_2}} dt - \frac{d_6 \cdot ([GSK3\beta_T] - [pGSK3\beta]) \cdot [CyclinD1]}{K_{6b} + [GSK3\beta_T] - [pGSK3\beta]} dt + \sigma_6 dB_6 \quad (6)$$

$$d[IL6] = \frac{V_7 \cdot [PKA]}{K_7 + [PKA]} dt - d_7[IL6]dt + \sigma_7 dB_7 \quad (7)$$

$$d[JAK2] = \frac{V_8 \cdot [IL6]}{K_8 + [IL6]} dt - d_8[JAK2]dt + \sigma_8 dB_8 \quad (8)$$

$$d[STAT3] = \frac{V_9 \cdot [JAK2]}{K_9 + [JAK2]} dt - d_9[STAT3]dt + \sigma_9 dB_9 \quad (9)$$

$$d[GFAP] = \left( \frac{C - [CyclinD1]}{C} \right)^+ \cdot \frac{V_{10ab} \cdot [CREB]}{K_{10a} + [CREB]} \cdot \frac{[STAT3]}{K_{10b} + [STAT3]} \cdot \frac{V_{10c} \cdot ([GSK3\beta_T] - [pGSK3\beta])^{n_3}}{K_{10c} + ([GSK3\beta_T] - [pGSK3\beta])^{n_3}} dt - d_{10}[GFAP]dt + \sigma_{10} dB_{10}, \quad (10)$$

where

$$(x)^+ = \begin{cases} x & x > 0 \\ 0 & x \leq 0, \end{cases}$$

and  $dB_i$ ,  $i = 1, \dots, 10$ , are independent, standard Brownian motion processes. We consider values of  $\sigma_i = \{0.001, 0.01, 0.05, 0.1\}$ ,  $i = 1, \dots, 10$ .

## S2 CLE Model Description

$$\frac{d[PKA]}{dt} = a_1 + \frac{V_1 \cdot CT^{n_1}}{K_1 + CT^{n_1}} - d_1[PKA] + \frac{1}{\sqrt{V}} \left[ \sqrt{a_1 + \frac{V_1 \cdot CT^{n_1}}{K_1 + CT^{n_1}}} \zeta_1(t) - \sqrt{d_1[PKA]} \zeta_2(t) \right] \quad (11)$$

$$\frac{d[CREB]}{dt} = \frac{V_2 \cdot [PKA]}{K_2 + [PKA]} - d_2[CREB] + \frac{1}{\sqrt{V}} \left[ \sqrt{\frac{V_2 \cdot [PKA]}{K_2 + [PKA]}} \zeta_3(t) - \sqrt{d_2[CREB]} \zeta_4(t) \right] \quad (12)$$

$$\frac{d[P13K]}{dt} = \frac{1}{1 + \frac{[PKA]}{K_3}} - d_3[P13K] + \frac{1}{\sqrt{V}} \left[ \sqrt{\frac{1}{1 + \frac{[PKA]}{K_3}}} \zeta_5(t) - \sqrt{d_3[P13K]} \zeta_6(t) \right] \quad (13)$$

$$\frac{d[AKT]}{dt} = \frac{V_4 \cdot [P13K]}{K_4 + [P13K]} - d_4[AKT] + \frac{1}{\sqrt{V}} \left[ \sqrt{\frac{V_4 \cdot [P13K]}{K_4 + [P13K]}} \zeta_7(t) - \sqrt{d_4[AKT]} \zeta_8(t) \right] \quad (14)$$

$$\begin{aligned} \frac{d[pGSK3\beta]}{dt} &= \frac{V_5 \cdot ([GSK3\beta_T] - [pGSK3\beta]) \cdot [AKT]}{K_5 + [GSK3\beta_T] - [pGSK3\beta]} - d_5[pGSK3\beta] \\ &+ \frac{1}{\sqrt{V}} \left[ \sqrt{\frac{V_5 \cdot ([GSK3\beta_T] - [pGSK3\beta]) \cdot [AKT]}{K_5 + [GSK3\beta_T] - [pGSK3\beta]}} \zeta_9(t) - \sqrt{d_5[pGSK3\beta]} \zeta_{10}(t) \right] \end{aligned} \quad (15)$$

$$\begin{aligned} \frac{d[CyclinD1]}{dt} &= \frac{V_6 \cdot [CyclinD1]^{n_2}}{K_{6a}^{n_2} + [CyclinD1]^{n_2}} - \frac{d_6 \cdot ([GSK3\beta_T] - [pGSK3\beta]) \cdot [CyclinD1]}{K_{6b} + [GSK3\beta_T] - [pGSK3\beta]} \\ &+ \frac{1}{\sqrt{V}} \left[ \sqrt{\frac{V_6 \cdot [CyclinD1]^{n_2}}{K_{6a}^{n_2} + [CyclinD1]^{n_2}}} \zeta_{11}(t) - \sqrt{\frac{d_6 \cdot ([GSK3\beta_T] - [pGSK3\beta]) \cdot [CyclinD1]}{K_{6b} + [GSK3\beta_T] - [pGSK3\beta]}} \zeta_{12}(t) \right] \end{aligned} \quad (16)$$

$$\frac{d[IL6]}{dt} = \frac{V_7 \cdot [PKA]}{K_7 + [PKA]} - d_7[IL6] + \frac{1}{\sqrt{V}} \left[ \sqrt{\frac{V_7 \cdot [PKA]}{K_7 + [PKA]}} \zeta_{13}(t) - \sqrt{d_7[IL6]} \zeta_{14}(t) \right] \quad (17)$$

$$\frac{d[JAK2]}{dt} = \frac{V_8 \cdot [IL6]}{K_8 + [IL6]} - d_8[JAK2] + \frac{1}{\sqrt{V}} \left[ \sqrt{\frac{V_8 \cdot [IL6]}{K_8 + [IL6]}} \zeta_{15}(t) - \sqrt{d_8[JAK2]} \zeta_{16}(t) \right] \quad (18)$$

$$\frac{d[STAT3]}{dt} = \frac{V_9 \cdot [JAK2]}{K_9 + [JAK2]} - d_9[STAT3] + \frac{1}{\sqrt{V}} \left[ \sqrt{\frac{V_9 \cdot [JAK2]}{K_9 + [JAK2]}} \zeta_{17}(t) - \sqrt{d_9[STAT3]} \zeta_{18}(t) \right] \quad (19)$$

$$\begin{aligned} \frac{d[GFAP]}{dt} &= \left( \frac{C - [CyclinD1]}{C} \right)^+ \cdot \frac{V_{10ab} \cdot [CREB]}{K_{10a} + [CREB]} \cdot \frac{[STAT3]}{K_{10b} + [STAT3]} \cdot \frac{V_{10c} \cdot ([GSK3\beta_T] - [pGSK3\beta])^{n_3}}{K_{10c} + ([GSK3\beta_T] - [pGSK3\beta])^{n_3}} \\ &- d_{10}[GFAP] \end{aligned} \quad (20)$$

$$+ \frac{1}{\sqrt{V}} \left[ \sqrt{\left( \frac{C - [CyclinD1]}{C} \right)^+ \cdot \frac{V_{10ab} \cdot [CREB]}{K_{10a} + [CREB]} \cdot \frac{[STAT3]}{K_{10b} + [STAT3]}} \right] \quad (21)$$

$$\left[ \sqrt{\frac{V_{10c} \cdot ([GSK3\beta_T] - [pGSK3\beta])^{n_3}}{K_{10c} + ([GSK3\beta_T] - [pGSK3\beta])^{n_3}}} \zeta_{19}(t) \sqrt{d_{10}[GFAP]} \zeta_{20}(t) \right] \quad (22)$$

where  $V$  is the total number of molecules for each protein,  $\zeta_i(t)$ ,  $i = 1, \dots, 20$ , are temporally uncorrelated, independent Gaussian white noise. Each parameter  $P_j$ ,  $j = 1, \dots, 39$  is also varied as  $P_j(1 + \lambda\epsilon_i)$ , where  $\epsilon_i$  is a standard normal random variable. Therefore, intrinsic noise has a standard deviation of  $\frac{1}{\sqrt{V}}$ , and extrinsic noise has a standard deviation of  $\lambda$ . We consider values of  $\frac{1}{\sqrt{V}} = \{0.001, 0.1\}$  and  $\lambda = \{0.001, 0.1\}$ . The CLE- model was obtained by multiplying parameter  $K_{6a}$  by 10.

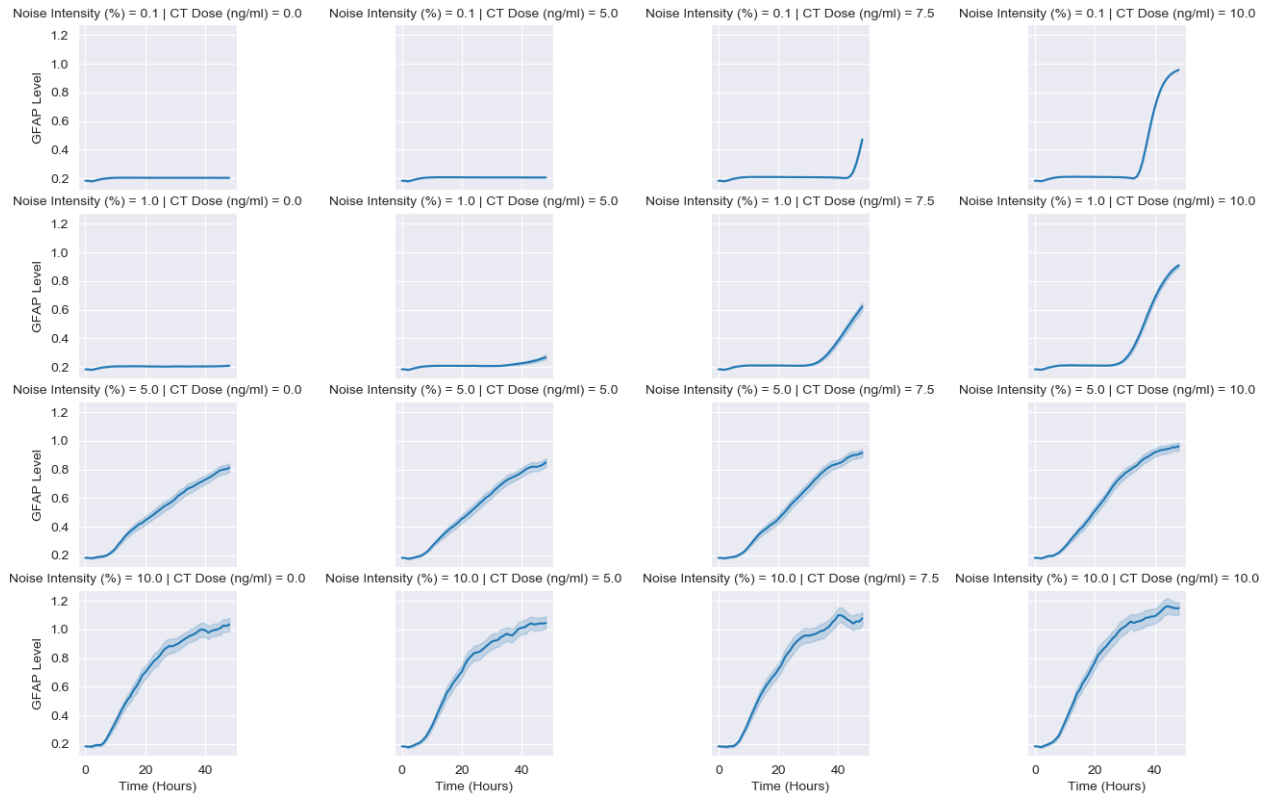

Figure S1: AN response dynamics. Time courses of GFAP level are shown, corresponding to 500 simulated cells exposed to different signals composed of CT dose and noise (expressed as noise intensity). Dark blue lines represent average GFAP level, with shaded areas indicating 95% confidence intervals.

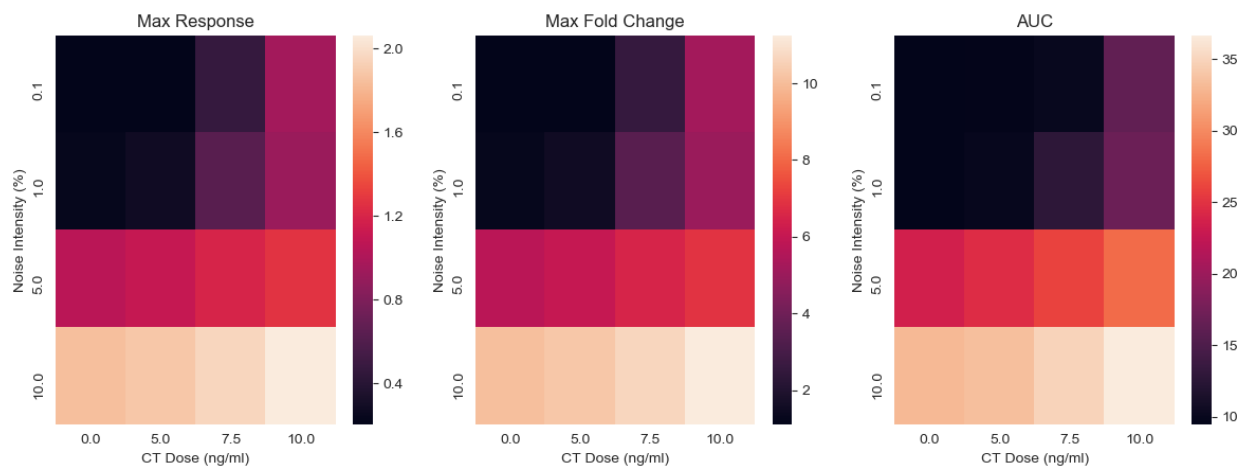

Figure S2: Heatmaps for summary descriptors of AN model. Average maximum response (*left*), maximum fold change (*center*), and area under the curve (*right*) values were calculated for the simulated cell population exposed to each signal.

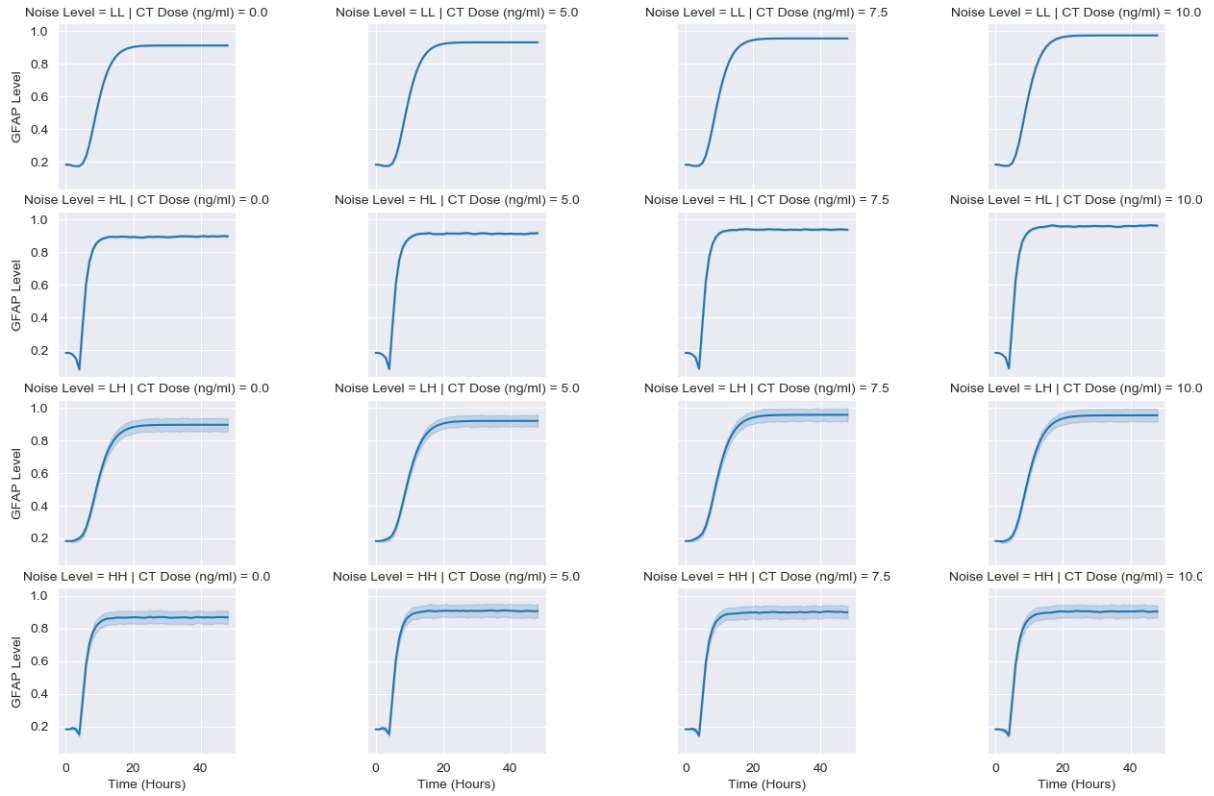

Figure S3: CLE- response dynamics. Time courses of GFAP level are shown, corresponding to 500 simulated cells exposed to different signals composed of CT dose and noise (intrinsic & extrinsic noise). Dark blue lines represent average GFAP level, with shaded areas indicating 95% confidence intervals. Noise levels are defined in Table 1, in main manuscript.

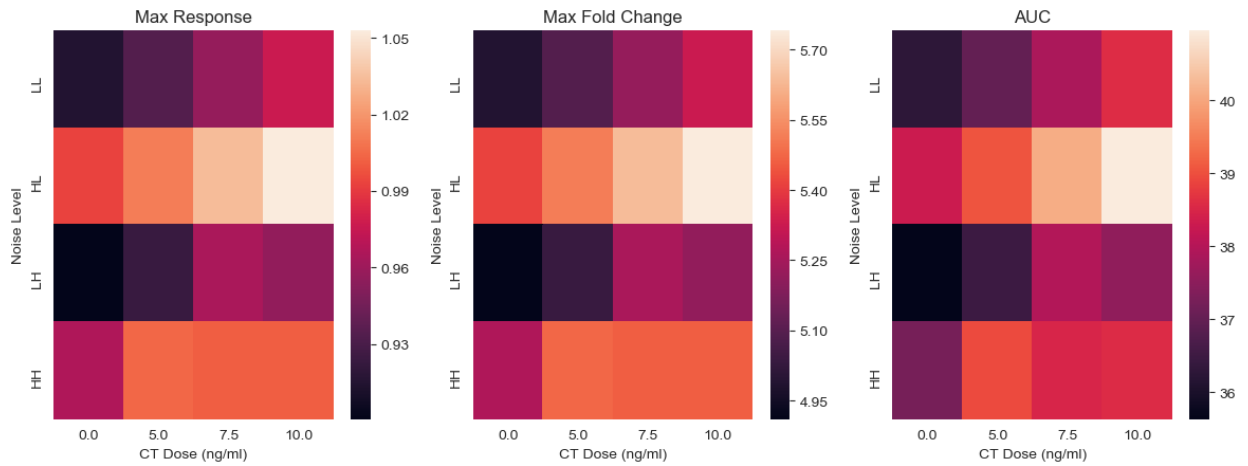

Figure S4: Heatmaps for summary descriptors of CLE- model. Average maximum response (*left*), maximum fold change (*center*), and area under the curve (*right*) values were calculated for the simulated cell population exposed to each signal. Noise levels are defined in Table 1.

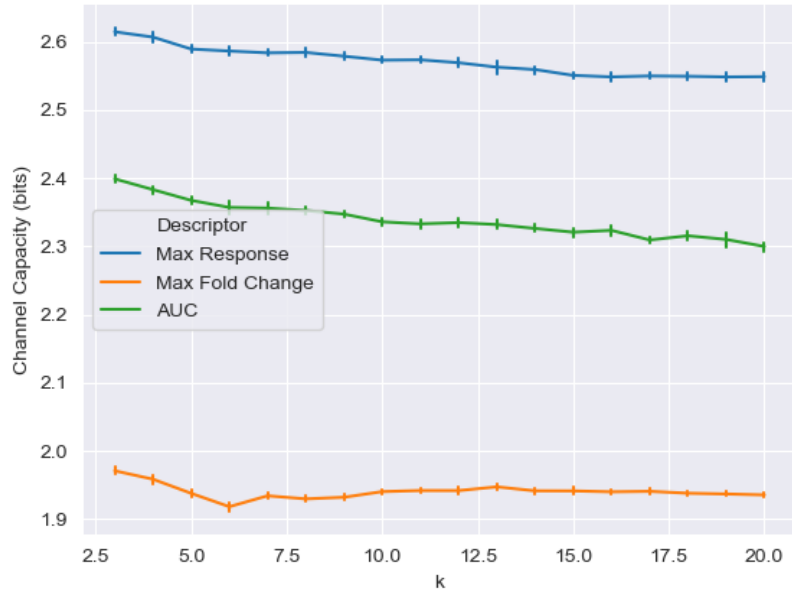

Figure S5: Channel capacities for summary descriptors of AN model as a function of  $k$  specified in  $k$ -nearest neighbors algorithm.

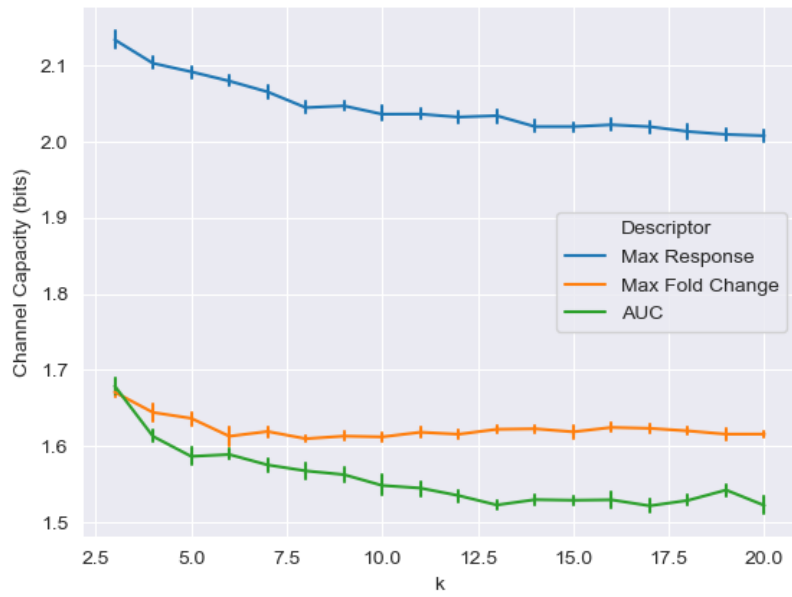

Figure S6: Channel capacities for summary descriptors of CLE model as a function of  $k$  specified in  $k$ -nearest neighbors algorithm.

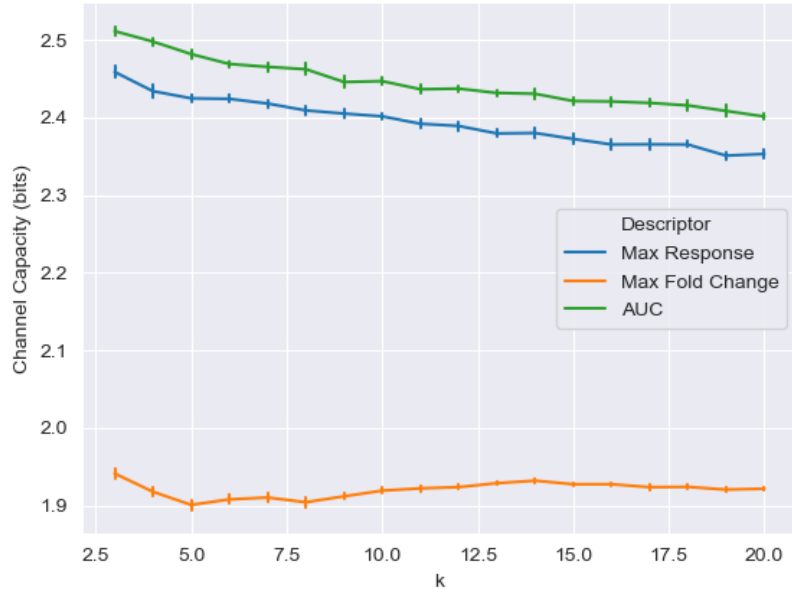

Figure S7: Channel capacities for summary descriptors of CLE- model as a function of  $k$  specified in  $k$ -nearest neighbors algorithm.

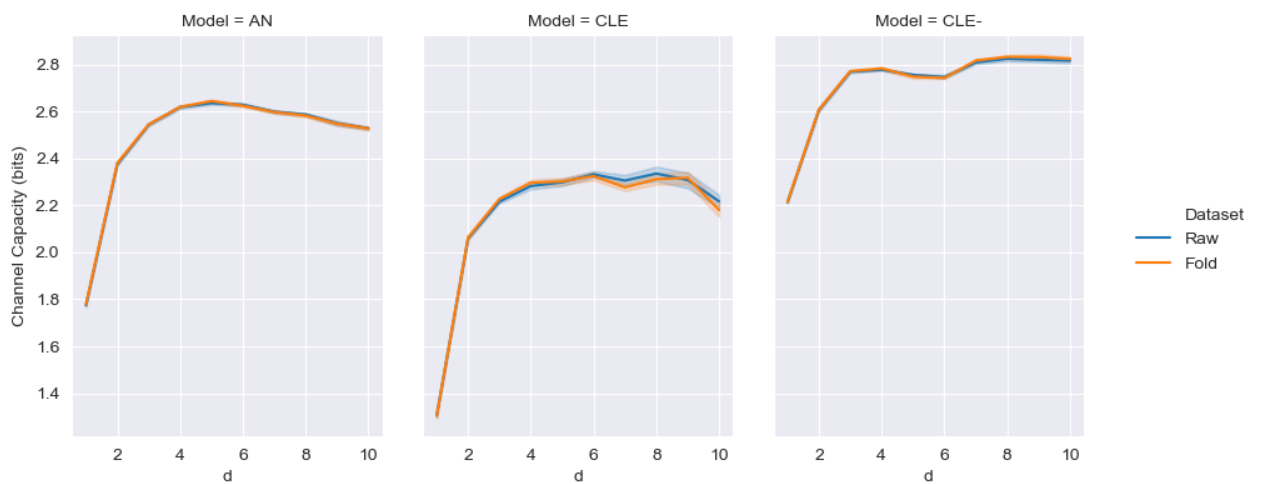

Figure S8: Channel capacities for multivariate response vectors of AN, CLE, and CLE- models as a function of vector dimension  $d$  specified in channel capacity algorithm. Results for both original and fold-transformed dynamics are shown.

Table S1: Initial conditions for model states [1, 2].

| State. No. | Symbol                            | Initial Condition |
|------------|-----------------------------------|-------------------|
| 1          | [ <i>PKA</i> ]                    | 1.6245            |
| 2          | [ <i>CREB</i> ]                   | 0.2600            |
| 3          | [ <i>P13K</i> ]                   | 1.0000            |
| 4          | [ <i>AKT</i> ]                    | 1.0000            |
| 5          | [ <i>GSK3<math>\beta</math></i> ] | 0.3000            |
| 6          | [ <i>CyclinD1</i> ]               | 1.0500            |
| 7          | [ <i>IL6</i> ]                    | 0.7239            |
| 8          | [ <i>JAK2</i> ]                   | 0.4080            |
| 9          | [ <i>STAT3</i> ]                  | 0.6818            |
| 10         | [ <i>GFAP</i> ]                   | 0.1834            |

Table S2: Parameter values for mathematical model [1, 2].

| Para. No. | Symbol        | Value  | Description                                                         |
|-----------|---------------|--------|---------------------------------------------------------------------|
| 1         | $V_1$         | 1.6245 | maximal activation velocity of PKA by Cholera toxin (CT)            |
| 2         | $K_1$         | 9.5398 | Michaelis constant of PKA by CT                                     |
| 3         | $V_2$         | 0.6602 | maximal activation velocity of CREB by PKA                          |
| 4         | $K_2$         | 0.5351 | Michaelis constant of CREB by PKA                                   |
| 5         | $K_3$         | 0.7018 | Michaelis constant of P13K inhibition by PKA                        |
| 6         | $V_4$         | 0.1136 | maximal activation velocity of AKT by P13K                          |
| 7         | $K_4$         | 0.4037 | Michaelis constant of AKT by P13K                                   |
| 8         | $V_5$         | 0.4449 | maximal phosphorylation velocity of GSK3 $\beta$ by AKT             |
| 9         | $K_5$         | 0.2951 | Michaelis constant of GSK3 $\beta$ by AKT                           |
| 10        | $V_6$         | 0.5448 | maximal self-amplification velocity of cyclin D1                    |
| 11        | $K_{6a}$      | 0.9413 | Michaelis constant of cyclin D1                                     |
| 12        | $K_{6b}$      | 0.8489 | Michaelis constant of cyclin D1 vt GSK3 $\beta$                     |
| 13        | $V_7$         | 0.6390 | maximal activation velocity of IL6 by PKA                           |
| 14        | $K_7$         | 0.2324 | Michaelis constant of IL6 inhibition by PKA                         |
| 15        | $V_8$         | 0.5359 | maximal activation velocity of IL6 by PKA                           |
| 16        | $K_8$         | 0.2558 | Michaelis constant of JAK2 by IL6                                   |
| 17        | $V_9$         | 0.7861 | maximal activation velocity of STAT3 by JAK2                        |
| 18        | $K_9$         | 0.6108 | Michaelis constant of STAT3 by JAK2                                 |
| 19        | $V_{10ab}$    | 0.0841 | maximal activation velocity of GFAP by CREB                         |
| 20        | $K_{10a}$     | 0.1316 | Michaelis constant of GFAP by CREB                                  |
| 21        | $K_{10b}$     | 0.1692 | Michaelis constant of GFAP by STAT3                                 |
| 22        | $V_{10c}$     | 0.5249 | maximal activation velocity of GFAP by GSK3 $\beta$                 |
| 23        | $K_{10c}$     | 0.7371 | Michaelis constant of GFAP by GSK3 $\beta$                          |
| 24        | $K_{10d}$     | 0.8384 | Michaelis constant of GFAP by cyclin D1                             |
| 25        | $d_1$         | 0.4668 | dephosphorylation rate of PKA                                       |
| 26        | $d_2$         | 0.5774 | dephosphorylation rate of CREB                                      |
| 27        | $d_3$         | 0.4602 | dephosphorylation rate of P13K                                      |
| 28        | $d_4$         | 0.7700 | dephosphorylation rate of AKT                                       |
| 29        | $d_5$         | 0.7147 | dephosphorylation rate of pGSK3 $\beta$                             |
| 30        | $d_6$         | 0.8363 | dephosphorylation rate of cyclin D1                                 |
| 31        | $d_7$         | 0.7163 | dephosphorylation rate of IL6                                       |
| 32        | $d_8$         | 0.9704 | dephosphorylation rate of JAK2                                      |
| 33        | $d_9$         | 0.7398 | dephosphorylation rate of STAT3                                     |
| 34        | $d_{10}$      | 0.4881 | dephosphorylation rate of GFAP                                      |
| 35        | $C$           | 1.25   | maximal steady state of cyclin D1                                   |
| 36        | $CT$          | 10     | CT dose (ng/ml)                                                     |
| 37        | $n_1$         | 3      | Hill coefficient of PKA activation induced by CT                    |
| 38        | $n_2$         | 10     | Hill coefficient of cyclin D1 feedback                              |
| 39        | $n_3$         | 8      | Hill coefficient of GFAP activation promoted by active GSK3 $\beta$ |
| 40        | $GSK3\beta_T$ | 1      | total amount of GSK3 $\beta$                                        |
| 41        | $a_1$         | 0.4668 | base activation rate of PKA due to cAMP                             |

## References

- [1] Sun, X., Zheng, X., Zhang, J., Zhou, T., Yan, G., Zhu, W.: Mathematical modeling reveals a critical role for cyclin D1 dynamics in phenotype switching during glioma differentiation. *FEBS Letters* **589**(18), 2304–2311 (2015)
- [2] Sun, X., Zhang, J., Zhao, Q., Chen, X., Zhu, W., Yan, G., Zhou, T.: Stochastic modeling suggests that noise reduces differentiation efficiency by inducing a heterogeneous drug response in glioma differentiation therapy. *BMC Systems Biology* **10**(1), 73 (2016)
